# Supplementary material
Source: publisher figshare collection journal article supplement (https://gsapubs.figshare.com/ndownloader/files/28896975)
Supplement: Supplementary file 1 [file 28896975]

## Sheet: Sheet1
Table S2. LA-ICPMS U-Pb geochronologic analyses.
							Isotope ratios						Apparent ages (Ma)
Analysis	U	206Pb	U/Th	206Pb*	±	207Pb*	±	206Pb*	±	error	206Pb*	±	207Pb*	±	206Pb*	±	Best age	±	Conc
	(ppm)	204Pb		207Pb*	(%)	235U*	(%)	238U	(%)	corr.	238U*	(Ma)	235U	(Ma)	207Pb*	(Ma)	(Ma)	(Ma)	(%)
B-90-1	799.054	1750.62	1.14569	24.5454	6.61445	0.0791329	6.87002	0.0140872	1.85639	0.270216	90.1785	1.66241	77.3294	5.11533	-303.769	169.336	90.1785	1.66241	NA
B-90-4	277.646	579.748	2.4823	113.737	63.98	0.0163911	64.1348	0.013521	4.45407	0.0694485	86.5782	3.83047	16.5083	10.5023	0	922.141	86.5782	3.83047	NA
B-90-6	502.35	1098.81	2.02945	32.5769	21.4502	0.057724	22.0851	0.0136385	5.25756	0.238059	87.3251	4.56021	56.9828	12.2387	-1088.91	654.45	87.3251	4.56021	NA
B-90-7	331.254	780.743	2.22964	33.4088	22.3334	0.0563968	22.801	0.0136652	4.59378	0.201473	87.4948	3.99217	55.7079	12.3604	-1165.83	693.849	87.4948	3.99217	NA
B-90-8	355.555	925.582	1.02501	35.7954	24.3977	0.0526334	24.6932	0.0136643	3.80875	0.154243	87.4894	3.30975	52.0841	12.5376	-1383.48	798.31	87.4894	3.30975	NA
B-90-9	147.592	384.855	1.67838	45.3978	46.9656	0.038713	47.8752	0.0127465	9.28817	0.194008	81.6499	7.53596	38.5667	18.1196	-2232.65	127.336	81.6499	7.53596	NA
B-90-10	317.202	999.984	1.56697	24.7079	15.891	0.0747893	16.2655	0.0134022	3.47033	0.213355	85.822	2.95857	73.2342	11.493	-320.679	409.931	85.822	2.95857	NA
B-90-11	342.32	1009.83	1.76026	32.0108	27.972	0.061152	28.2705	0.0141973	4.09772	0.144947	90.8781	3.69781	60.2681	16.5438	-1036.21	848.875	90.8781	3.69781	NA
B-90-12	564.371	1362.62	2.22154	23.7309	16.9917	0.080067	17.6906	0.0137806	4.92324	0.278297	88.2287	4.31412	78.2079	13.3168	-218.192	429.807	88.2287	4.31412	NA
B-90-13	396.094	1080.06	1.24657	31.0726	19.0839	0.0614861	19.2091	0.0138565	2.19027	0.114022	88.7116	1.92972	60.5878	11.2984	-948.178	563.239	88.7116	1.92972	NA
B-90-14	486.687	1251.58	1.77817	27.8222	14.3232	0.0672808	14.4194	0.0135763	1.66257	0.115301	86.9297	1.43557	66.1158	9.23	-635.272	393.874	86.9297	1.43557	NA
B-90-15	3169.72	11201.5	4.31614	20.729	1.99007	0.0904701	3.38259	0.0136014	2.73523	0.808622	87.0891	2.36607	87.9412	2.84952	111.107	46.9835	87.0891	2.36607	NA
B-90-16	354.924	787.767	2.60587	33.2029	31.605	0.0553995	32.0337	0.0133408	5.22326	0.163055	85.4316	4.43288	54.7488	17.0753	-1146.85	987.557	85.4316	4.43288	NA
B-90-17	1544.61	3721.48	2.13938	22.23	3.7313	0.0917093	3.95345	0.014786	1.30659	0.330494	94.6191	1.22726	89.0944	3.37221	-56.4859	90.9197	94.6191	1.22726	NA
B-90-18	485.63	1309.4	1.56695	23.5685	15.5762	0.0826063	16.1444	0.0141203	4.2457	0.262982	90.3888	3.81086	80.5924	12.5089	-200.954	392.294	90.3888	3.81086	NA
B-90-19	2073.25	5059.73	2.97341	22.4839	5.02919	0.0850175	5.29115	0.0138637	1.64424	0.310752	88.7571	1.44938	82.8513	4.20973	-84.2273	123.261	88.7571	1.44938	NA
B-90-20	619.963	1280.59	1.15424	28.335	14.2768	0.0678058	14.7129	0.0139344	3.5558	0.241678	89.207	3.15017	66.6151	9.48672	-685.566	396.795	89.207	3.15017	NA
B-90-21	1358.27	3012.47	1.01685	22.8348	5.65331	0.0872201	6.13459	0.0144448	2.38186	0.388268	92.4513	2.18635	84.9105	4.9971	-122.304	139.603	92.4513	2.18635	NA
B-90-22	222.578	450.897	2.34252	178.587	103.277	0.0106342	103.509	0.0137738	6.91876	0.0668424	88.1854	6.0598	10.7407	11.0594	0	0	88.1854	6.0598	NA
B-90-23	3013.58	6226.02	1.66793	21.3241	2.31667	0.0934188	2.53701	0.0144479	1.03415	0.407625	92.4705	0.949454	90.6831	2.2009	43.8752	55.3684	92.4705	0.949454	NA
B-90-25	204.856	374.282	1.41655	-127.515	150.684	-0.0142667	150.873	0.0131942	7.5473	0.0500242	84.499	6.33578	-14.5905	-22.1756	0	0	84.499	6.33578	NA
C-55-1	3507.9	9026.23	1.61442	20.8697	2.04867	0.0970328	2.65521	0.014687	1.68911	0.636149	93.9902	1.57608	94.0337	2.38467	95.1517	48.5105	93.9902	1.57608	NA
C-55-3	4268.06	11622.1	1.4488	20.37	1.56598	0.101105	3.57316	0.014937	3.21172	0.898848	95.578	3.04706	97.7961	3.33141	152.198	36.6652	95.578	3.04706	NA
C-55-4	4487.12	17752.4	1.2257	20.6776	1.84645	0.105541	3.31659	0.0158278	2.75507	0.830693	101.234	2.76727	101.878	3.21492	116.974	43.5359	101.234	2.76727	NA
C-55-5	4686.85	24939.1	0.961103	19.9924	1.53811	0.104793	3.47039	0.0151949	3.11092	0.896418	97.2156	3.00161	101.191	3.34243	195.904	35.7376	97.2156	3.00161	NA
C-55-6	3609.51	13285.4	0.686572	20.7805	2.67744	0.098848	3.31646	0.0148978	1.95709	0.590114	95.3293	1.85195	95.7124	3.02926	105.246	63.2596	95.3293	1.85195	NA
C-55-7	1045.19	3148.49	1.74058	23.3915	6.16938	0.0854849	6.61293	0.0145026	2.38109	0.360066	92.8185	2.19426	83.2886	5.28802	-182.095	154.155	92.8185	2.19426	NA
C-55-8	393.273	1178.95	2.33676	31.0227	18.612	0.0683013	18.8106	0.0153677	2.72586	0.144911	98.3128	2.65954	67.0862	12.212	-943.47	548.552	98.3128	2.65954	NA
C-55-9	5420.37	16442.4	1.18762	20.6271	1.37378	0.10088	2.44934	0.0150919	2.0278	0.827898	96.5616	1.94348	97.5885	2.279	122.73	32.3811	96.5616	1.94348	NA
C-55-10	504.527	1271.18	1.69144	29.3876	14.2985	0.0671976	14.6045	0.0143224	2.97423	0.203651	91.6734	2.70728	66.0366	9.33767	-787.644	406.198	91.6734	2.70728	NA
C-55-11	729.372	1997	2.51215	24.0968	12.2877	0.086673	12.4648	0.0151475	2.0937	0.16797	96.9149	2.01393	84.3994	10.0952	-256.806	312.304	96.9149	2.01393	NA
C-55-12	470.837	1491.23	1.84352	25.702	20.6728	0.0821284	20.8712	0.0153094	2.87066	0.137542	97.9432	2.79036	80.144	16.0852	-422.971	546.411	97.9432	2.79036	NA
C-55-13	233.072	606.133	1.47793	31.5302	32.6559	0.0643514	33.4567	0.0147158	7.27598	0.217475	94.1727	6.80219	63.325	20.5421	-991.222	986.92	94.1727	6.80219	NA
C-55-14	5329.82	25473.4	0.990073	20.0263	1.06694	0.103194	1.76013	0.0149884	1.39989	0.795334	95.9044	1.33262	99.7207	1.67178	191.962	24.8346	95.9044	1.33262	NA
C-55-15	2404.23	7299.39	1.39051	20.7717	5.78003	0.0946119	6.6209	0.0142533	3.22916	0.487723	91.2341	2.92535	91.7905	5.81081	106.255	136.663	91.2341	2.92535	NA
C-55-16	815.759	2554.17	1.71386	22.8124	7.64423	0.0927408	7.79411	0.0153441	1.52116	0.195168	98.1632	1.48191	90.0534	6.71671	-119.887	188.759	98.1632	1.48191	NA
C-55-17	3802.92	11470.2	0.57767	18.9798	3.96937	0.109008	4.15884	0.0150054	1.24099	0.298399	96.0125	1.18268	105.057	4.15076	315.371	90.2894	96.0125	1.18268	NA
C-55-18	3026.56	14365.7	2.30241	19.4785	3.35993	0.107002	3.64675	0.0151163	1.41764	0.38874	96.7165	1.36086	103.219	3.57916	256.047	77.2552	96.7165	1.36086	NA
C-55-19	5481.46	45588.5	0.646692	19.8494	1.87288	0.0999716	2.37594	0.014392	1.462	0.615333	92.1158	1.33715	96.7501	2.19261	212.513	43.3971	92.1158	1.33715	NA
C-55-20	5161.22	20803.6	1.25196	20.3397	1.70982	0.104173	3.73659	0.0153673	3.32244	0.889164	98.3107	3.24153	100.621	3.57952	155.715	40.0432	98.3107	3.24153	NA
C-55-22	334.904	1020.98	1.65135	26.9217	23.0911	0.0746752	23.5156	0.0145807	4.44847	0.189171	93.3145	4.12117	73.1263	16.593	-546.01	627.369	93.3145	4.12117	NA
C-55-23	716.48	3491.3	2.18798	20.543	12.1119	0.0989593	13.3388	0.0147441	5.588	0.418929	94.3527	5.23404	95.8152	12.1967	132.361	285.661	94.3527	5.23404	NA
C-55-24	138.322	386.489	1.645	34.9749	45.7191	0.0558351	46.4916	0.0141632	8.43957	0.181529	90.6615	7.59789	55.1678	24.9691	-1309.12	1517.59	90.6615	7.59789	NA
C-55-25	426.958	1380.65	1.97613	29.4816	18.6329	0.068448	19.14	0.0146356	4.37683	0.228674	93.6634	4.06985	67.2256	12.4509	-796.686	531.861	93.6634	4.06985	NA
C-55-26	1091.34	3332.75	2.1513	21.3579	5.81354	0.0940129	7.23077	0.0145628	4.29963	0.59463	93.2009	3.97847	91.2347	6.30936	40.1308	139.148	93.2009	3.97847	NA
C-55-27	410.909	1096.79	1.6326	25.6052	16.435	0.0784555	17.4509	0.0145697	5.86705	0.336204	93.2446	5.43133	76.6918	12.8911	-413.09	432.121	93.2446	5.43133	NA
C-55-28	418.755	1640.26	1.99911	23.7937	12.3776	0.0856762	12.6662	0.014785	2.68842	0.212252	94.6123	2.52501	83.4676	10.1496	-224.834	312.614	94.6123	2.52501	NA
C-55-29	653.784	2239.1	1.92024	23.5671	17.2042	0.0855665	17.5382	0.0146254	3.40615	0.194213	93.5987	3.16508	83.3649	14.0375	-200.8	433.785	93.5987	3.16508	NA
C-55-30	591.368	2112.98	2.35169	23.2633	11.5894	0.095464	11.6463	0.0161068	1.14901	0.0986591	103.004	1.17412	92.5806	10.3056	-168.395	289.367	103.004	1.17412	NA
C-55-31	9996.73	27948.1	0.953443	20.1825	0.875937	0.10225	8.45688	0.0149671	8.4114	0.994621	95.7692	7.99599	98.8514	7.96587	173.82	20.4496	95.7692	7.99599	NA
C-55-32	2303.11	14799.2	0.969511	18.968	6.22278	0.106426	6.67965	0.0146409	2.42791	0.363478	93.6972	2.25843	102.691	6.52402	316.759	141.614	93.6972	2.25843	NA
C-55-33	663.314	2184.58	2.74241	23.7927	8.51811	0.0874882	9.30035	0.015097	3.73339	0.401425	96.5944	3.57936	85.1608	7.59734	-224.733	214.792	96.5944	3.57936	NA
C-55-34	5185.57	15675.4	1.01911	20.5374	2.02012	0.0981737	2.67618	0.0146231	1.75528	0.655892	93.584	1.6308	95.0891	2.42923	133.032	47.4753	93.584	1.6308	NA
C-55-35	3110.7	25711.4	0.743176	19.8137	3.07853	0.126113	4.34448	0.0181227	3.06548	0.705604	115.781	3.51755	120.599	4.94024	216.713	71.2741	115.781	3.51755	NA
C-55-36	715.475	2536.02	2.9971	23.5776	10.678	0.0852566	10.7455	0.0145789	1.20199	0.111861	93.3032	1.11342	83.075	8.57157	-201.913	268.275	93.3032	1.11342	NA
C-55-37	4907.51	34759.7	0.74133	20.0558	2.86836	0.0958154	3.26058	0.0139371	1.55046	0.475516	89.2241	1.37385	92.9063	2.89484	188.497	66.7653	89.2241	1.37385	NA
C-55-38	1213.5	5621.54	1.09925	21.0037	7.00265	0.097392	7.27178	0.014836	1.96001	0.269536	94.9367	1.84713	94.3661	6.55297	79.9422	166.421	94.9367	1.84713	NA
C-55-39	1650.95	5553.88	1.06451	21.5947	5.51232	0.0945736	5.71533	0.014812	1.50977	0.264161	94.7843	1.42055	91.7549	5.01418	13.6541	132.605	94.7843	1.42055	NA
C-55-40	846.319	2353.26	2.17824	24.4608	7.21621	0.0828891	7.60655	0.0147051	2.4054	0.316228	94.1047	2.24716	80.8575	5.91202	-294.949	184.447	94.1047	2.24716	NA
C-55-41	779.536	2447.44	2.10659	22.1819	11.8596	0.085409	12.4834	0.0137405	3.89708	0.31218	87.9737	3.40512	83.2176	9.97444	-51.2105	289.515	87.9737	3.40512	NA
C-55-42	1336.19	3463.54	1.19067	22.3166	5.90397	0.0906593	6.35603	0.0146737	2.35421	0.370391	93.9054	2.19471	88.1174	5.36468	-65.9666	144.199	93.9054	2.19471	NA
C-55-43	4277.54	37496	1.12922	19.9401	2.3632	0.100171	3.38739	0.0144867	2.42687	0.716443	92.7171	2.23402	96.9342	3.13169	201.947	54.8856	92.7171	2.23402	NA
C-55-44	583.418	2978.92	1.4686	23.0639	15.7002	0.0757702	17.5907	0.0126745	7.93317	0.450987	81.1915	6.40067	74.1604	12.5809	-147.002	391.313	81.1915	6.40067	NA
C-55-45	671.431	2058.25	1.92459	24.3065	10.6501	0.0813809	11.0307	0.0143464	2.87277	0.260434	91.8258	2.61924	79.4424	8.42921	-278.816	271.679	91.8258	2.61924	NA
C-55-46	498.98	1659.34	1.3504	25.4767	16.9936	0.0776628	17.5503	0.0143501	4.38514	0.249862	91.8491	3.99916	75.9452	12.843	-399.948	445.797	91.8491	3.99916	NA
C-55-47	853.8	5787.36	2.00253	18.9669	11.3738	0.101679	12.0561	0.013987	3.99834	0.331644	89.5414	3.55542	98.3247	11.2987	316.888	259.358	89.5414	3.55542	NA
C-55-48	905.39	3305.56	1.80724	23.2487	7.30409	0.0859913	8.4955	0.0144994	4.33864	0.510698	92.7983	3.99734	83.7622	6.83051	-166.823	182.02	92.7983	3.99734	NA
C-55-49	714.416	2448.27	2.0749	22.3053	8.63469	0.0900457	9.20559	0.014567	3.1914	0.34668	93.2273	2.95384	87.5459	7.72161	-64.7279	211.032	93.2273	2.95384	NA
C-55-50	1004.58	3847.49	3.60753	22.8602	6.62236	0.0896363	6.9708	0.0148615	2.17633	0.312207	95.0986	2.05447	87.1646	5.82264	-125.05	163.659	95.0986	2.05447	NA
A-23-15	523.774	11318.7	1.30818	20.8324	7.93862	0.0886962	9.67891	0.0134012	5.53712	0.572081	85.816	4.72025	86.2881	8.00689	99.3544	188.061	85.816	4.72025	NA
A-23-13	913.139	19175	1.13548	22.5889	5.47379	0.085265	5.6927	0.013969	1.56349	0.274649	89.4267	1.38853	83.0829	4.54136	-95.6568	134.467	89.4267	1.38853	NA
A-23-14	627.733	12819.4	1.24207	24.6019	15.3653	0.0789044	15.7732	0.0140789	3.56371	0.225935	90.1256	3.18947	77.1144	11.7135	-309.66	395.381	90.1256	3.18947	NA
A-23-8	384.818	7533.04	2.16811	25.0033	24.849	0.078864	25.6613	0.0143013	6.40553	0.249618	91.5391	5.82213	77.0764	19.049	-351.278	649.927	91.5391	5.82213	NA
A-23-16	568.648	13113.9	1.33306	19.3682	13.4857	0.101974	13.9729	0.0143244	3.65753	0.261759	91.6857	3.3297	98.5965	13.1298	269.082	310.491	91.6857	3.3297	NA
A-23-23	943.611	24501	1.49085	22.3188	7.94885	0.0886314	8.26834	0.0143469	2.27624	0.275296	91.8289	2.07543	86.2277	6.83536	-66.2108	194.292	91.8289	2.07543	NA
A-23-25	565.551	10607.4	1.94209	22.2275	10.5578	0.0891191	12.3886	0.0143668	6.48149	0.523183	91.9553	5.91777	86.6825	10.2935	-56.2068	257.818	91.9553	5.91777	NA
A-23-17	1074.38	33724.5	1.3264	20.8778	4.86218	0.0952394	5.31568	0.0144212	2.14841	0.404165	92.3008	1.96887	92.3724	4.69353	94.2373	115.19	92.3008	1.96887	NA
A-23-22	556.512	9868.23	1.27919	22.9227	13.6211	0.0873191	14.2362	0.0145169	4.13942	0.290767	92.9092	3.81833	85.0029	11.609	-131.798	338.037	92.9092	3.81833	NA
A-23-10	912.704	16564.5	1.06399	21.0973	9.26585	0.0949689	10.2791	0.0145314	4.45012	0.432929	93.0015	4.10896	92.1216	9.05265	69.3909	220.829	93.0015	4.10896	NA
A-23-2C	1121.54	18003.7	1.47861	21.431	9.70825	0.0937387	9.88274	0.01457	1.84888	0.187082	93.2469	1.71161	90.9801	8.60048	31.9236	233.04	93.2469	1.71161	NA
A-23-3C	667.403	12112	1.24164	24.1048	9.56688	0.0834311	9.94538	0.0145858	2.71762	0.273255	93.3468	2.51854	81.3656	7.77654	-257.65	242.912	93.3468	2.51854	NA
A-23-26	789.165	13596.6	1.20317	23.0037	10.6588	0.0875951	11.1096	0.0146142	3.13241	0.281956	93.5276	2.90852	85.2607	9.08556	-140.521	264.585	93.5276	2.90852	NA
A-23-1	643.878	12083.6	1.14143	21.5089	13.2829	0.093757	13.6081	0.0146259	2.95727	0.217317	93.6015	2.74805	90.9972	11.8449	23.2518	319.945	93.6015	2.74805	NA
A-23-12	637.542	12067.2	1.60318	20.3151	12.6319	0.0992825	12.9844	0.0146281	3.00526	0.231451	93.616	2.79308	96.1138	11.9079	158.537	296.591	93.616	2.79308	NA
A-23-22R	512.941	11739.9	2.15098	21.3905	15.5943	0.0947947	15.8517	0.0147063	2.84528	0.179493	94.1127	2.65832	91.9601	13.9375	36.4383	375.216	94.1127	2.65832	NA
A-23-27	811.1	16714.9	1.13267	21.6046	7.07165	0.0939335	7.47372	0.0147186	2.41832	0.323577	94.1906	2.26127	91.161	6.51631	12.5394	170.207	94.1906	2.26127	NA
A-23-7	841.061	13368.2	1.51259	22.5671	10.7257	0.0900774	11.0383	0.0147431	2.60857	0.23632	94.3465	2.44317	87.5755	9.26196	-93.2803	263.807	94.3465	2.44317	NA
A-23-21	518.061	10395.2	1.66398	21.341	8.32097	0.0953485	9.12113	0.014758	3.73584	0.40958	94.4411	3.50245	92.4735	8.06212	42.0027	199.27	94.4411	3.50245	NA
A-23-2	567.615	11131.3	1.811	24.8814	22.4172	0.0820192	22.525	0.0148009	2.20098	0.097713	94.7136	2.06939	80.0416	17.3387	-338.665	583.438	94.7136	2.06939	NA
A-23-20	1443.79	29573.4	0.792429	21.6778	7.22401	0.094191	7.34677	0.0148089	1.33743	0.182044	94.7645	1.25814	91.3999	6.42167	4.41968	174.151	94.7645	1.25814	NA
A-23-4C	482.75	9112.69	2.0073	23.516	15.3767	0.0872274	15.5684	0.014877	2.43521	0.156421	95.1967	2.30121	84.9173	12.6832	-195.359	386.801	95.1967	2.30121	NA
A-23-11	574.485	11995.3	1.26844	22.9083	15.3742	0.0897512	15.5091	0.0149119	2.04129	0.131619	95.4183	1.93342	87.2715	12.9704	-130.241	381.853	95.4183	1.93342	NA
A-23-6R	1660.41	31024.8	0.865642	20.8568	3.58274	0.0988568	3.77279	0.0149538	1.18233	0.313384	95.6849	1.12296	95.7205	3.44635	96.5839	84.8262	95.6849	1.12296	NA
A-23-24	498.996	10180	1.42879	21.8933	15.0673	0.0945428	16.2129	0.015012	5.98611	0.36922	96.0544	5.7073	91.7264	14.2205	-19.4306	366.261	96.0544	5.7073	NA
A-23-5	814.22	14324.3	1.08129	21.4925	10.4924	0.0966422	11.0879	0.0150644	3.58486	0.323311	96.3873	3.42964	93.6721	9.92194	25.0709	252.277	96.3873	3.42964	NA
A-23-9	678.074	12656.4	1.43304	20.866	7.86449	0.0999524	8.3873	0.0151262	2.91489	0.347536	96.7798	2.79995	96.7324	7.73891	95.572	186.419	96.7798	2.79995	NA
A-23-18	479.533	8042.37	1.31316	22.4331	16.1865	0.0940611	16.5256	0.0153037	3.33056	0.201539	97.9069	3.23621	91.2794	14.4273	-78.688	398.259	97.9069	3.23621	NA
A-23-6	1205.76	17727.5	1.14821	20.0314	3.85727	0.105886	4.12422	0.0153833	1.45967	0.353927	98.412	1.42559	102.195	4.00962	191.371	89.7555	98.412	1.42559	NA
A-23-19	6763.85	272746	1.91708	20.5568	1.39712	0.103962	3.71325	0.0154998	3.44039	0.926517	99.1518	3.38511	100.427	3.55063	130.807	32.8392	99.1518	3.38511	NA
D-108-1	1401.49	9924.57	1.5564	19.2252	7.22024	0.113091	7.55035	0.0157688	2.20817	0.292459	100.859	2.20981	108.789	7.78941	286.069	165.288	100.859	2.20981	NA
D-108-2	357.376	10978	2.07544	24.6269	13.6395	0.0858422	14.3934	0.0153324	4.59725	0.319399	98.0887	4.47525	83.6228	11.5544	-312.256	350.784	98.0887	4.47525	NA
D-108-4	787.134	40225.8	2.2561	21.7582	5.38506	0.101745	5.94984	0.0160558	2.53017	0.425251	102.68	2.57741	98.3854	5.57917	-4.47683	129.993	102.68	2.57741	NA
D-108-5	278.728	8498.54	1.35516	21.2591	10.4908	0.0958395	11.3183	0.014777	4.24817	0.375337	94.5619	3.98783	92.9286	10.0513	51.1803	251.009	94.5619	3.98783	NA
D-108-6	240.023	5666.58	1.79804	23.6338	30.7729	0.0927346	31.3869	0.0158955	6.17783	0.196829	101.663	6.2313	90.0476	27.0525	-207.885	788.009	101.663	6.2313	NA
D-108-7	590.616	15828	2.3933	21.5032	10.1903	0.106315	11.8466	0.0165804	6.04148	0.509975	106.008	6.35206	102.589	11.56	23.876	245.035	106.008	6.35206	NA
D-108-8	205.388	5926.71	1.63063	22.6186	28.8659	0.0907229	29.1153	0.0148827	3.80301	0.130619	95.233	3.5951	88.1766	24.5945	-98.8817	721.914	95.233	3.5951	NA
D-108-9	324.286	13442.9	1.65859	20.7565	7.5641	0.0982639	8.1222	0.0147927	2.9588	0.364286	94.6615	2.78038	95.1725	7.37902	108	178.857	94.6615	2.78038	NA
D-108-10	215.866	8503.82	1.49583	19.7927	15.7623	0.103963	16.0706	0.0149239	3.13287	0.194944	95.4945	2.96967	100.428	15.368	219.156	366.718	95.4945	2.96967	NA
D-108-11	232.387	5982.41	2.17465	21.2923	25.1179	0.103554	25.715	0.0159915	5.50946	0.214251	102.272	5.59019	100.052	24.5061	47.4388	608.299	102.272	5.59019	NA
D-108-12	416.038	7687.15	1.60426	21.7991	10.1761	0.0943593	10.7096	0.0149184	3.33826	0.311706	95.4597	3.16321	91.5561	9.37651	-9.00343	246.229	95.4597	3.16321	NA
D-108-13	244.481	17426.7	1.50025	21.9696	20.8823	0.09139	21.0089	0.0145619	2.30301	0.109621	93.1953	2.13086	88.7974	17.8647	-27.8472	510.74	93.1953	2.13086	NA
D-108-14	199.834	12423	1.65965	20.1876	26.2538	0.103221	26.7605	0.015113	5.18277	0.193672	96.696	4.97413	99.7451	25.4284	173.223	622.069	96.696	4.97413	NA
D-108-15	852.315	23841.6	1.2413	20.7603	7.24136	0.101553	7.46818	0.0152907	1.82657	0.24458	97.8241	1.77333	98.2092	6.99101	107.591	171.242	97.8241	1.77333	NA
D-108-16	441.743	7982.36	2.00075	20.2342	11.1462	0.111902	11.9029	0.0164219	4.17603	0.350843	105.003	4.34942	107.704	12.164	167.847	261.046	105.003	4.34942	NA
D-108-17	305.338	8086.2	1.32815	19.8191	10.1404	0.110197	11.7697	0.0158399	5.97492	0.507651	101.311	6.00591	106.146	11.8628	216.053	235.31	101.311	6.00591	NA
D-108-18	442.291	6266.53	2.26347	20.5999	13.9162	0.100676	15.9235	0.0150415	7.7393	0.486031	96.2418	7.39312	97.4005	14.7899	125.838	328.956	96.2418	7.39312	NA
D-108-20	241.384	7427.47	1.43006	21.7705	20.5256	0.097177	21.0362	0.0153437	4.6066	0.218984	98.1606	4.48761	94.1671	18.9206	-5.83455	499.754	98.1606	4.48761	NA
D-108-21	1409.61	26088.4	7.99237	19.8511	2.78736	0.106906	3.07144	0.0153916	1.29009	0.420029	98.4649	1.26064	103.131	3.01206	212.314	64.5968	98.4649	1.26064	NA
D-108-23	145.852	2624.84	1.52409	21.8948	23.5022	0.0926717	23.9379	0.0147159	4.54658	0.189932	94.1737	4.25055	89.9892	20.6174	-19.5963	575.369	94.1737	4.25055	NA
D-108-24	1365.68	23776.9	2.27767	20.9749	4.62898	0.0887321	8.64205	0.0134983	7.29778	0.84445	86.4338	6.26565	86.3216	7.15177	83.1979	109.891	86.4338	6.26565	NA
D-108-25	272.794	10386	1.5919	23.441	17.154	0.0845356	17.802	0.0143719	4.75956	0.267361	91.988	4.34713	82.4002	14.0904	-187.38	431.348	91.988	4.34713	NA
